# Supplementary material for: PFKP is a prospective prognostic, diagnostic, immunological and drug sensitivity predictor across pan-cancer
Source: Springer Nature journal article supplement (doi:10.1038/s41598-023-43982-2), 2023-10-13

**A**PFKP expression ( $\text{Log}_2(\text{TPM}+1)$ )10.0  
7.5  
5.0  
2.5  
0.0

Breast Neoplasm, NOS  
Squamous Cell Carcinoma of the Vulva/Vagina  
Hepatoblastoma  
Mixed Cervical Carcinoma  
Myelodysplastic Syndromes  
Ovarian Cancer, Other  
Non-Seminomatous Germ Cell Tumor  
Medullary Thyroid Cancer  
Ocular Melanoma  
Ovarian Germ Cell Tumor  
Nerve Sheath Tumor  
Rhabdomyosarcoma  
Retinoblastoma  
Prostate Small Cell Carcinoma  
Cervical Squamous Cell Carcinoma  
Glassy Cell Carcinoma of the Cervix  
Colorectal Adenocarcinoma  
Adrenocortical Carcinoma  
Myeloproliferative Neoplasms  
Head and Neck Squamous Cell Carcinoma  
Acute Myeloid Leukemia  
Neuroblastoma  
Bladder Squamous Cell Carcinoma  
Cutaneous Squamous Cell Carcinoma  
Liposarcoma  
Invasive Breast Carcinoma  
Breast Ductal Carcinoma In Situ  
Epithelioid Sarcoma  
Rhabdoid Cancer  
Embryonal Tumor  
B-Lymphoblastic Leukemia/Lymphoma  
Prostate Adenocarcinoma  
Non-Hodgkin Lymphoma  
Non-Hodgkin Lymphoma  
Mucosal Melanoma of the Vulva/Vagina  
Intraductal Papillary Neoplasm of the Bile Duct  
Esophagogastric Adenocarcinoma  
Osteosarcoma  
Small Bowel Cancer  
Synovial Sarcoma  
Endometrial Carcinoma  
Esophageal Squamous Cell Carcinoma  
Melanoma  
Urethral Cancer  
Lung Neuroendocrine Tumor  
Ewing Sarcoma  
Hodgkin Lymphoma  
Hepatocellular Carcinoma  
Hepatocellular Carcinoma plus Intrahepatic Cholangiocarcinoma  
Merkel Cell Carcinoma  
Cervical Adenocarcinoma  
Cervical Adenocarcinoma/Lymphoma  
Pancreatic Adenocarcinoma  
Gestational Trophoblastic Disease  
Ovarian Epithelial Tumor  
High-Grade Spindle Cell Sarcoma  
Pancreatic Neuroendocrine Tumor  
Poorly Differentiated Thyroid Cancer  
Intracholecystic Papillary Neoplasm  
Uterine Sarcoma/Mesenchymal  
Bladder Urothelial Carcinoma  
Diffuse Glioma  
Ampullary Carcinoma  
Pleural Mesothelioma  
Adenosquamous Carcinoma of the Pancreas  
Non-Small Cell Lung Cancer  
Leiomyosarcoma  
Meningothelial Tumor  
Non-Cancerous  
Well-Differentiated Thyroid Cancer  
Anaplastic Thyroid Cancer  
Chondrosarcoma  
Fibrosarcoma  
Renal Cell Carcinoma  
Sarcoma, NOS

**B**

PFKP expression in TCGA tumor samples

Cancer Type

ACC  
BLCA  
BRCA  
CESC  
CHOL  
COAD  
DLBC  
ESCA  
GBM  
HNSC  
KICH  
KIRC  
KIRP  
LAML  
LGG  
LIHC  
LUAD  
LUSC  
MESO  
OV  
PAAD  
PCPG  
PRAD  
READ  
SARC  
SKCM  
STAD  
TGCT  
THCA  
THYM  
UCEC  
UCS  
UVM

PFKP expression ( $\text{log}_2\text{FPKM}$ )

-4 -2 0 2 4 6 8 10 12

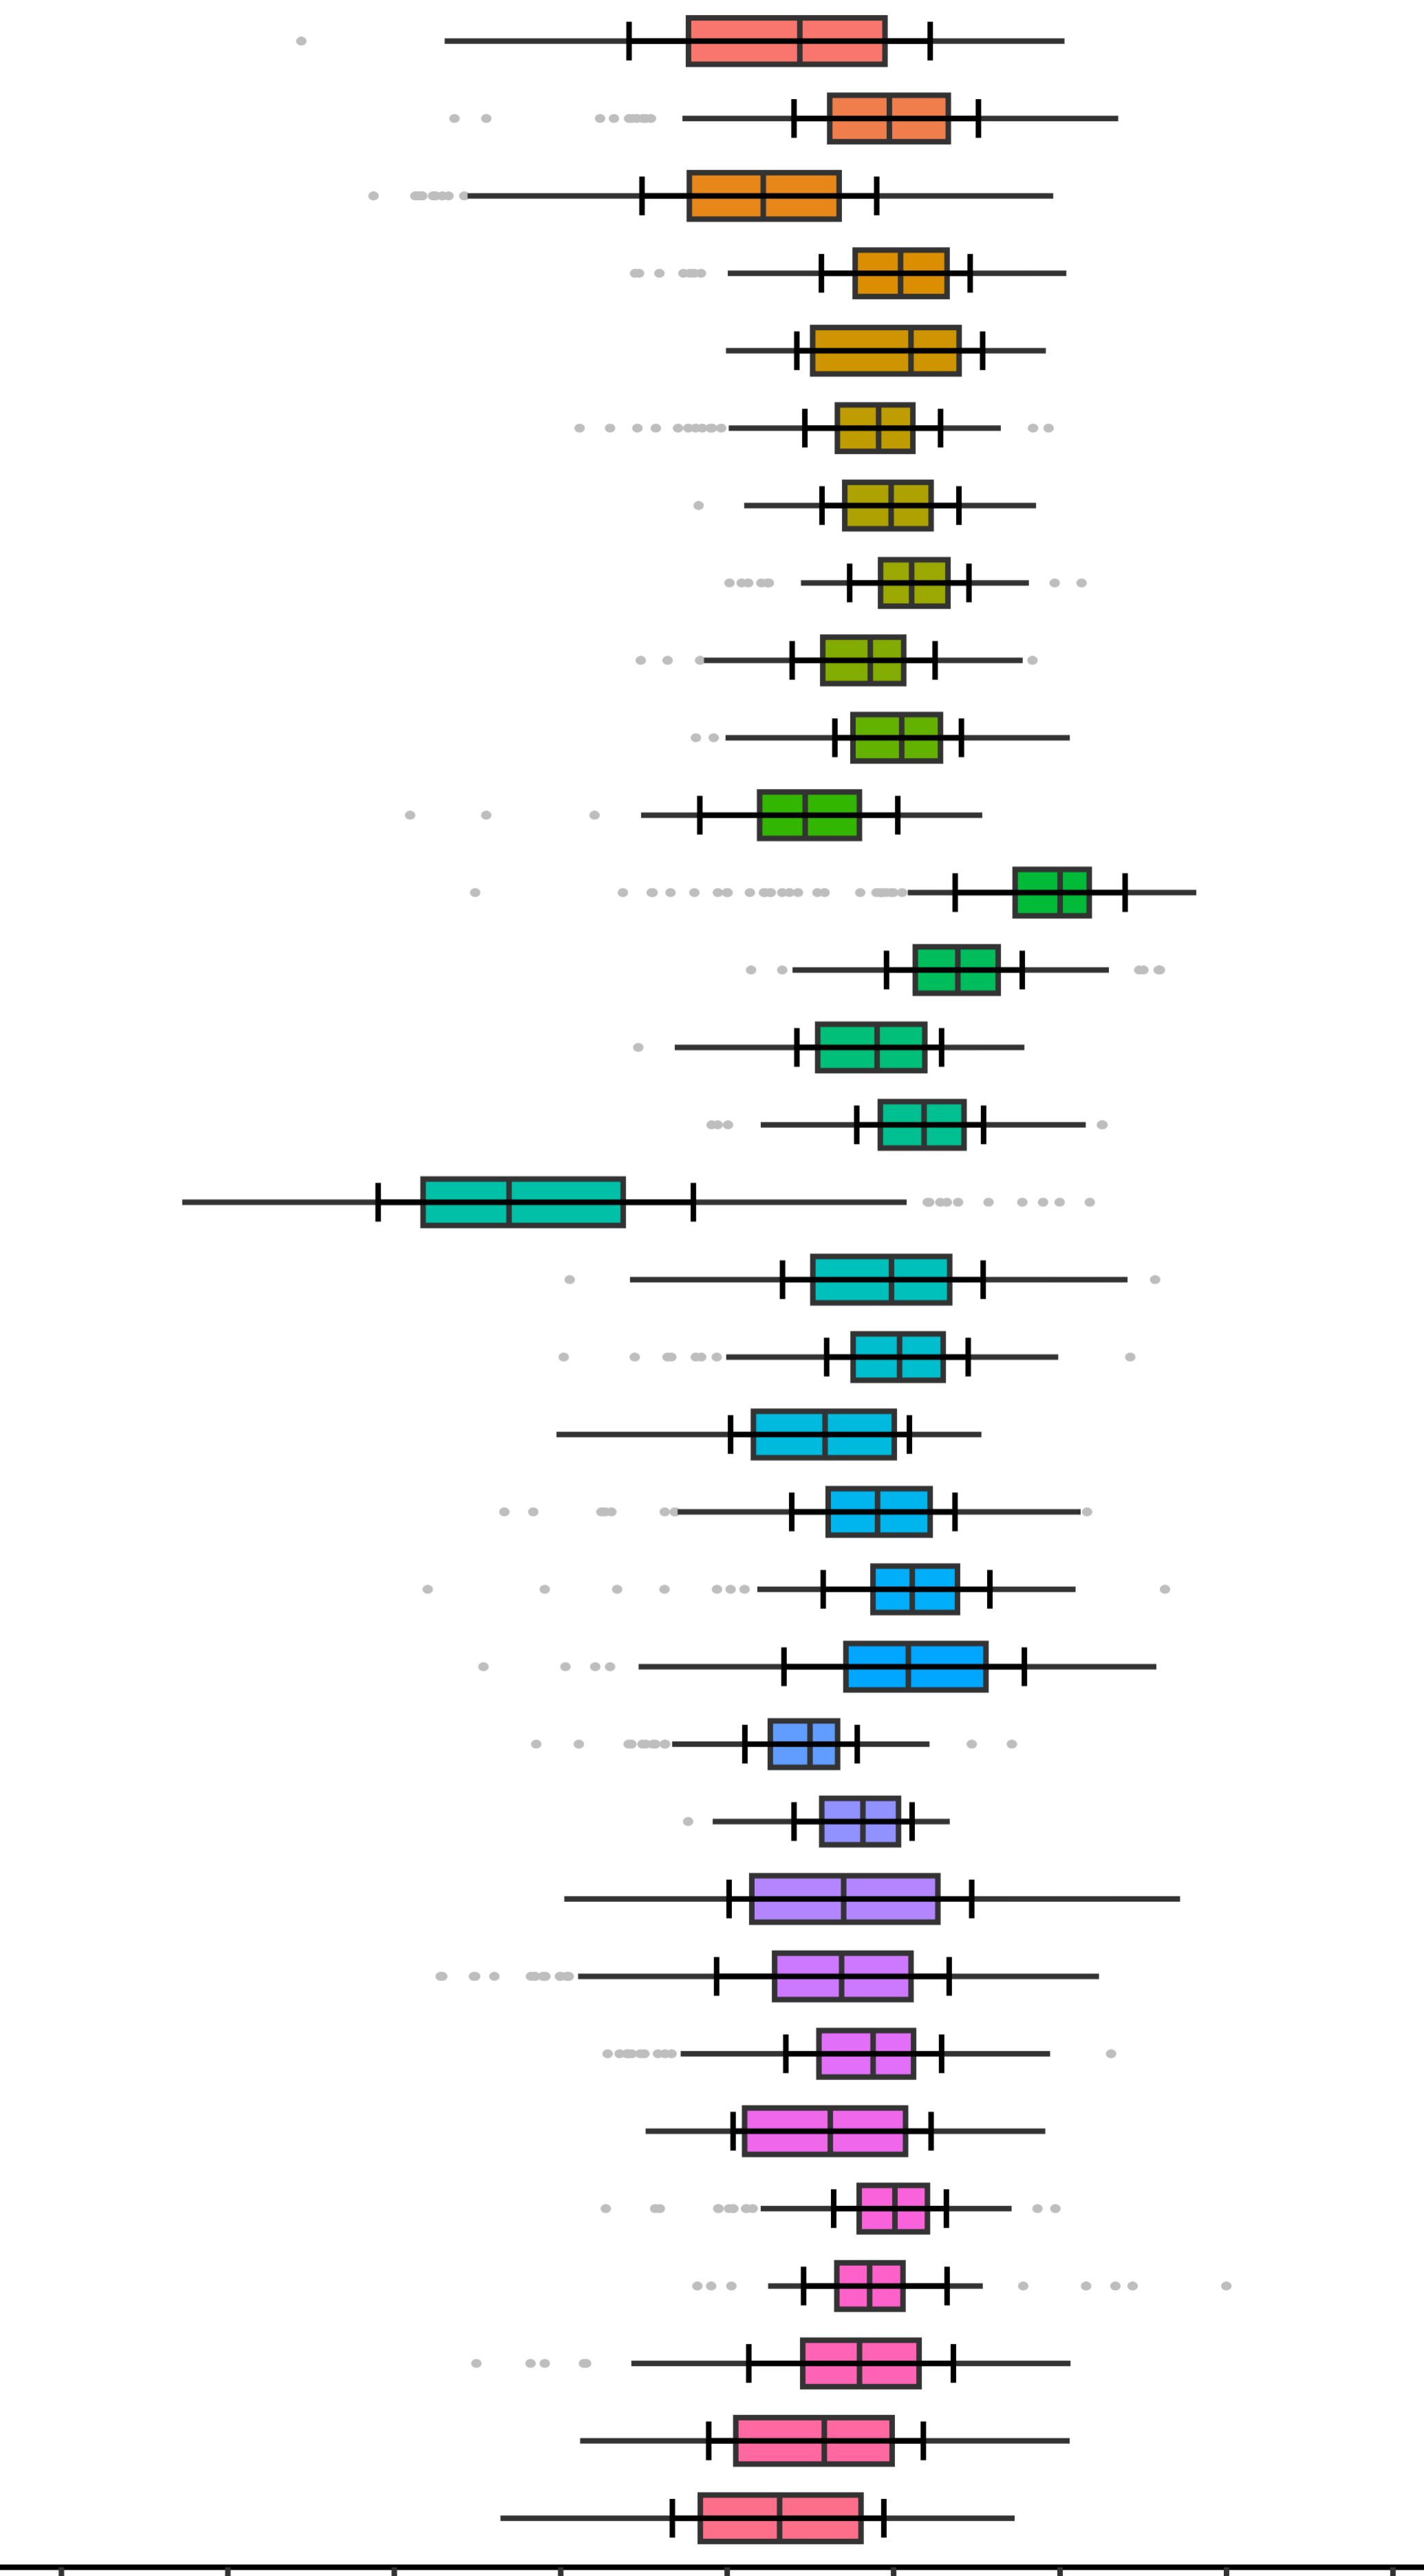

Supplement: MOESM1 [file 41598_2023_43982_MOESM1_ESM.pdf]
