# Supplementary material for: PFKP is a prospective prognostic, diagnostic, immunological and drug sensitivity predictor across pan-cancer
Source: Springer Nature journal article supplement (doi:10.1038/s41598-023-43982-2), 2023-10-13
Supplement: MOESM3 [file 41598_2023_43982_MOESM3_ESM-1.pdf]

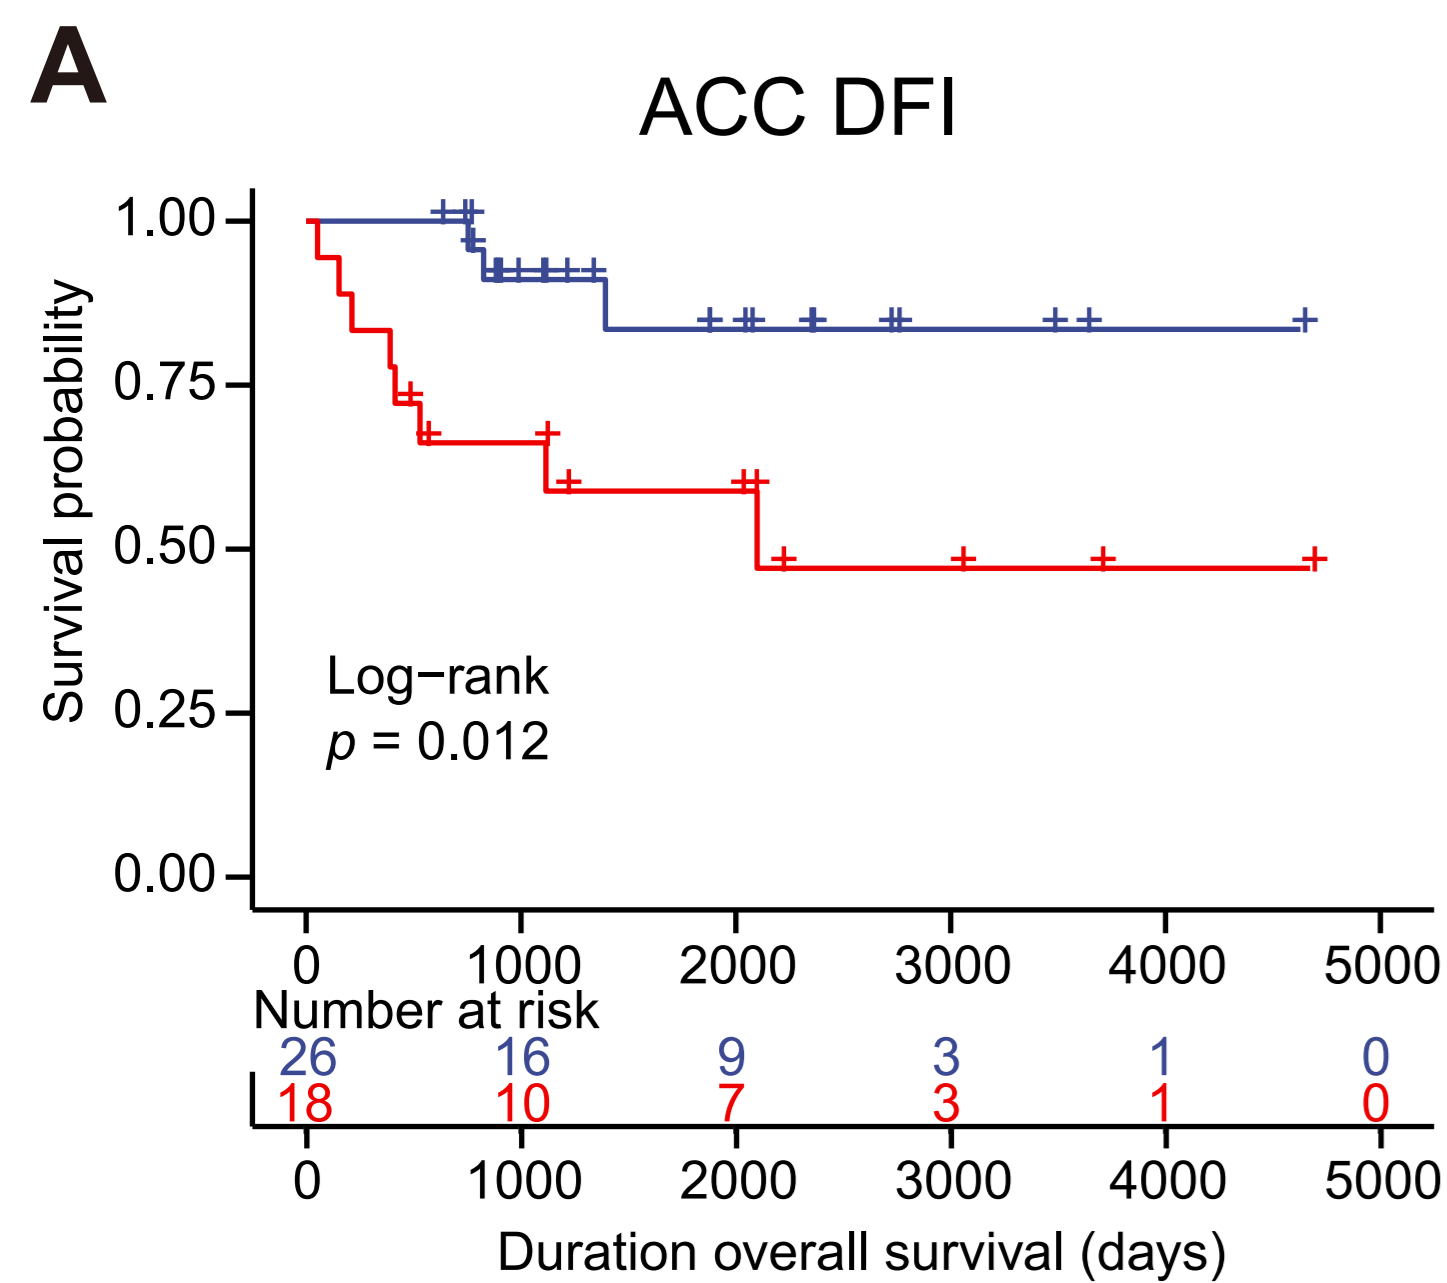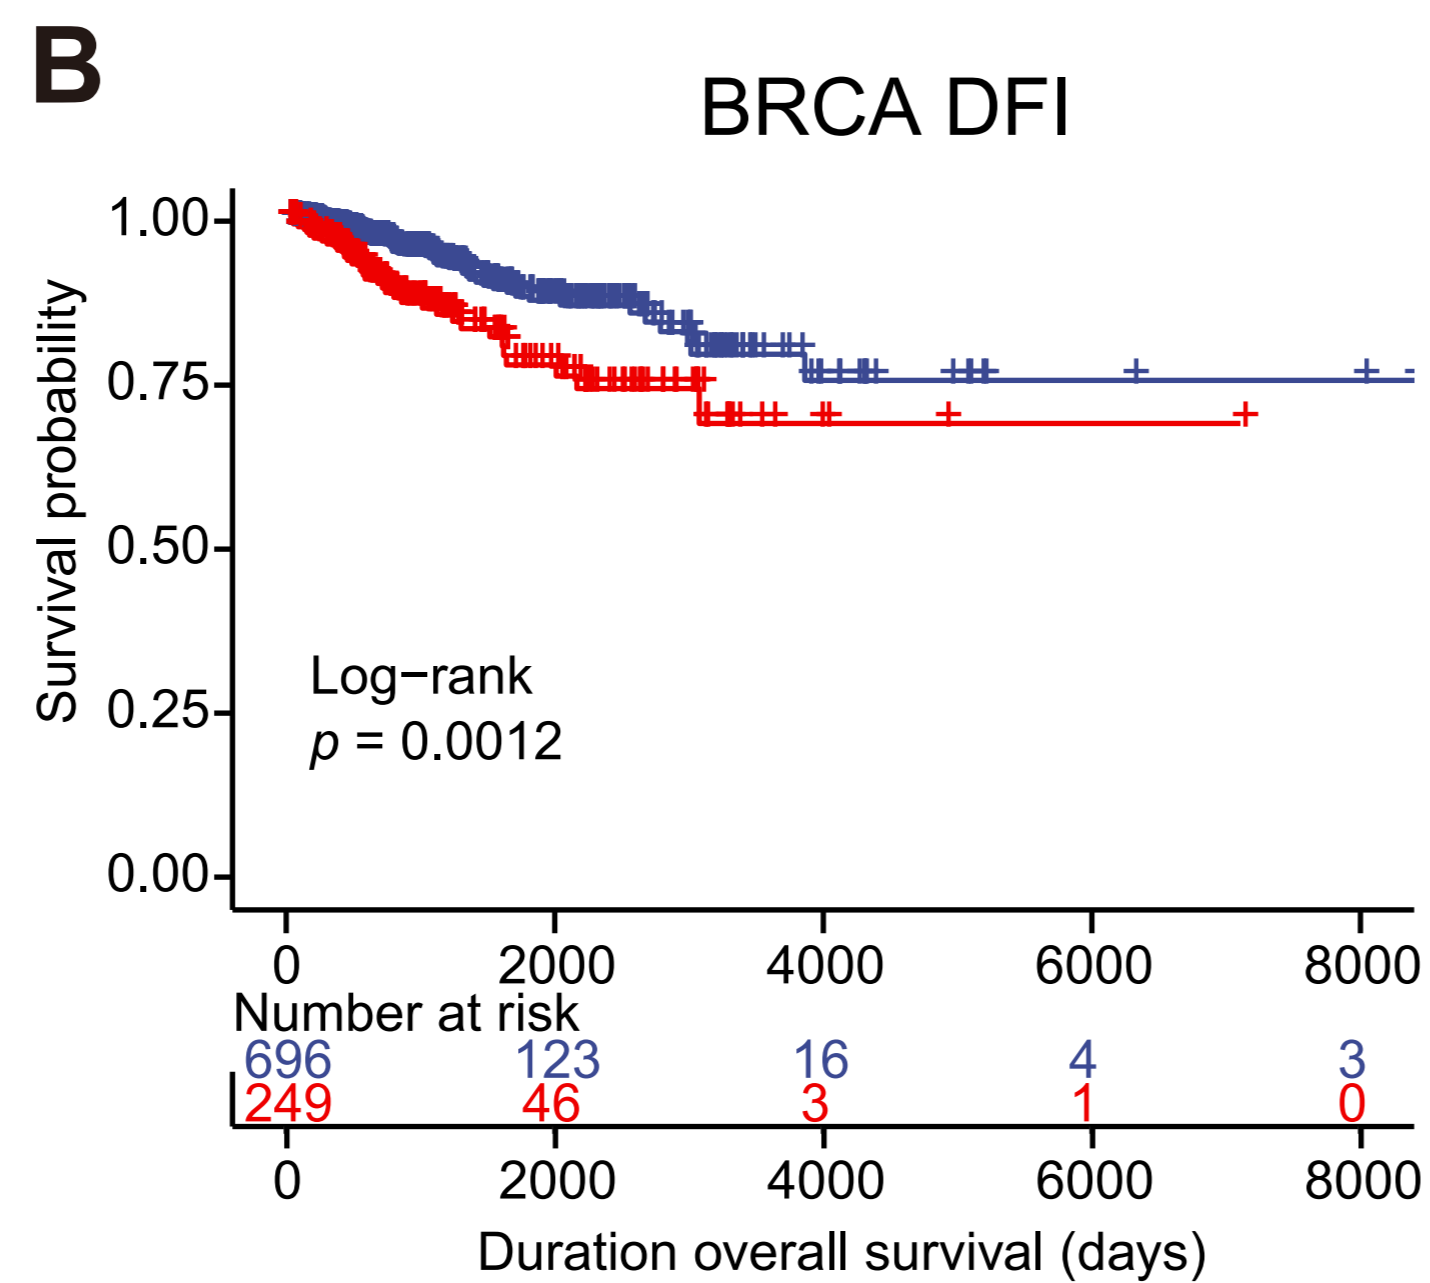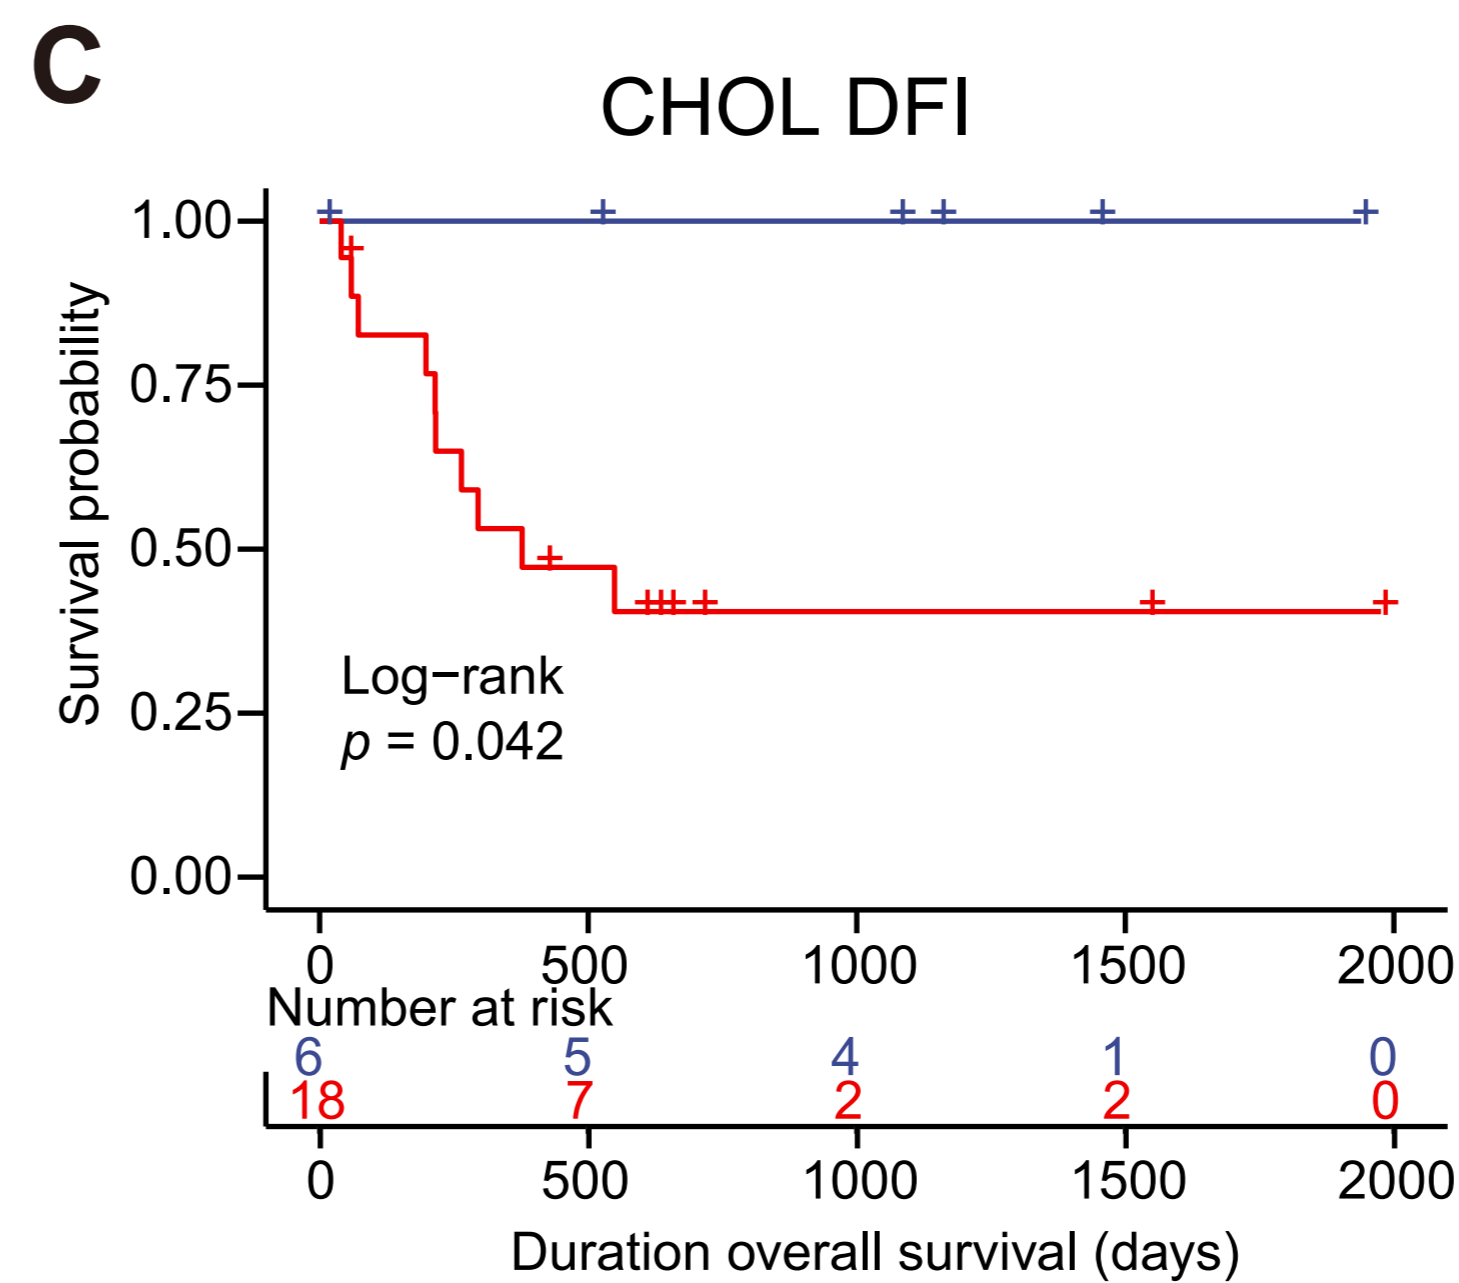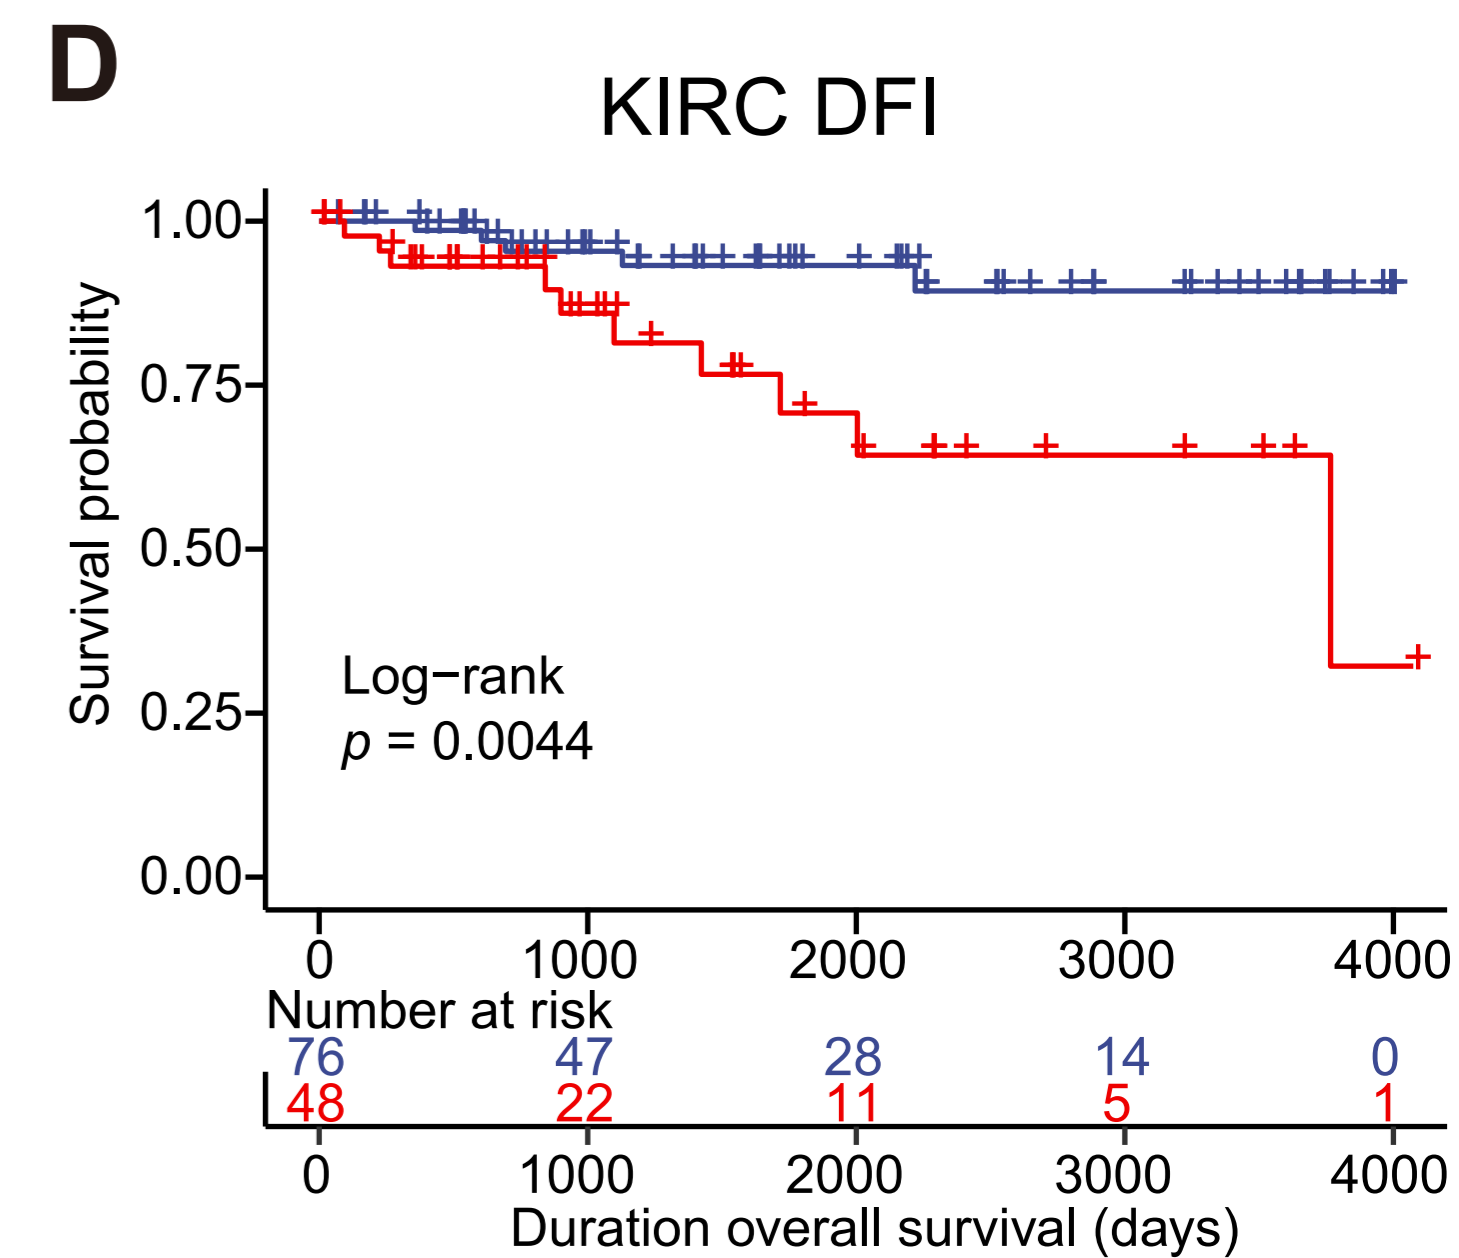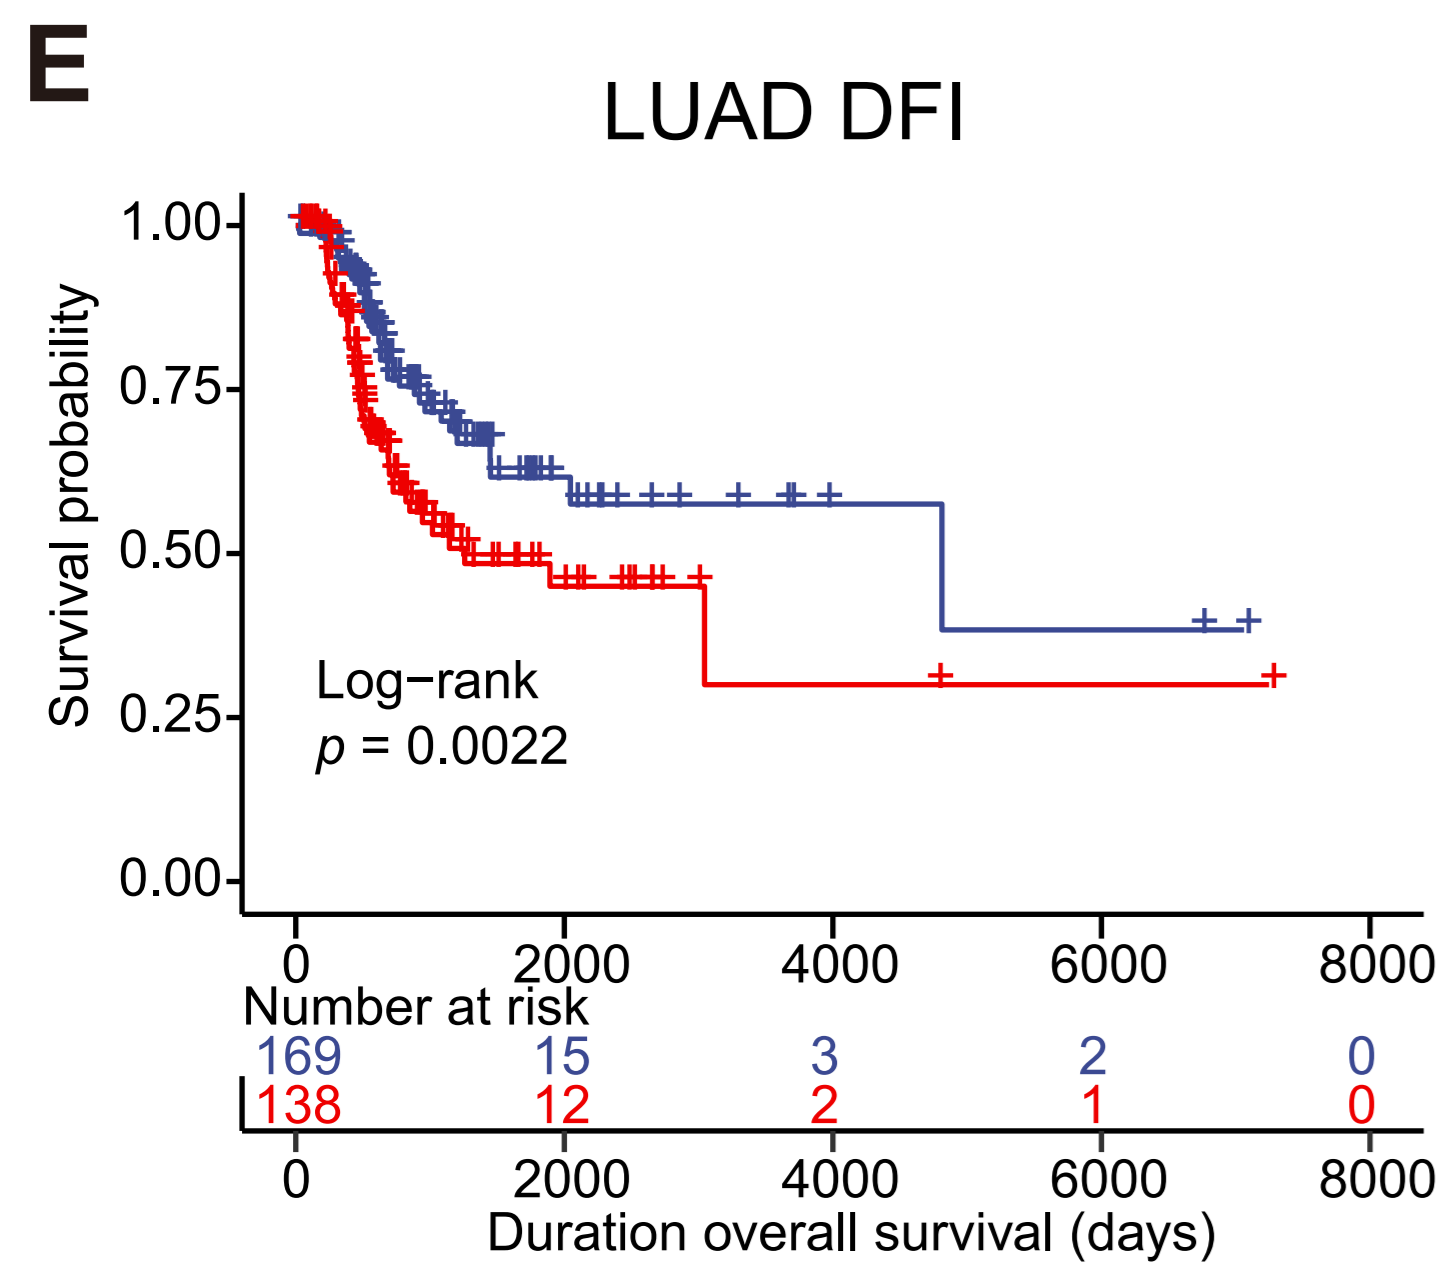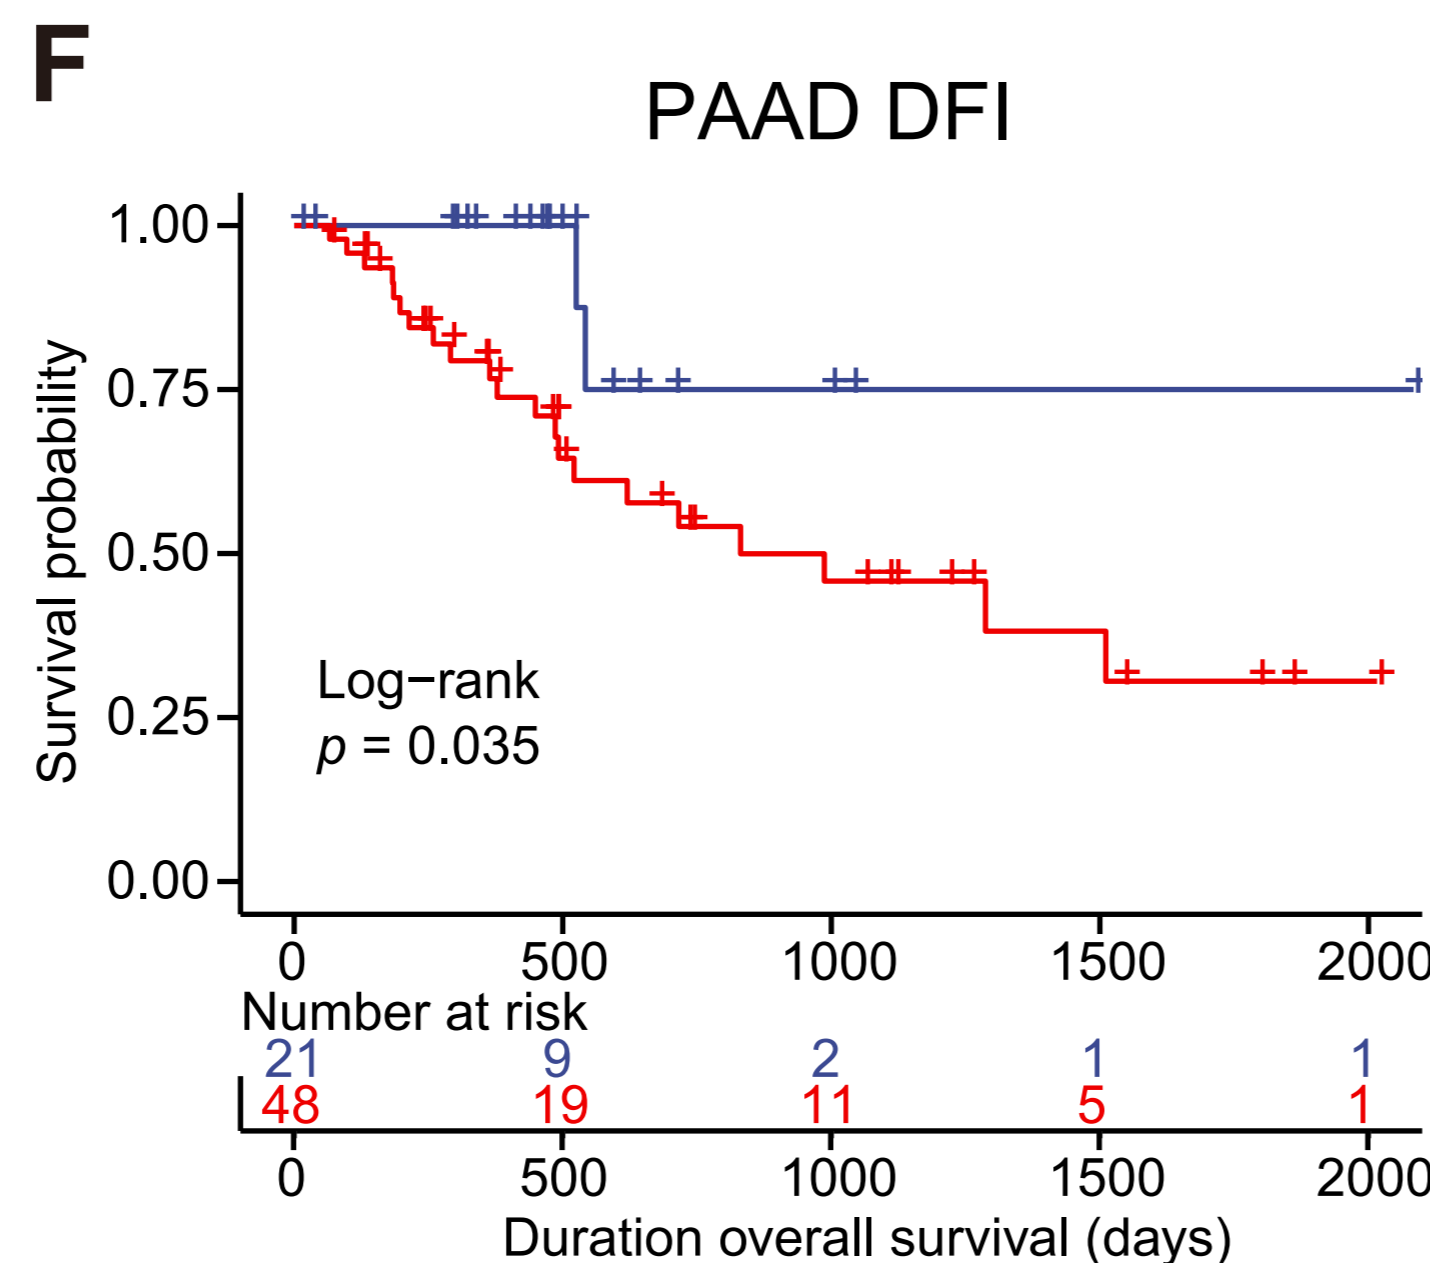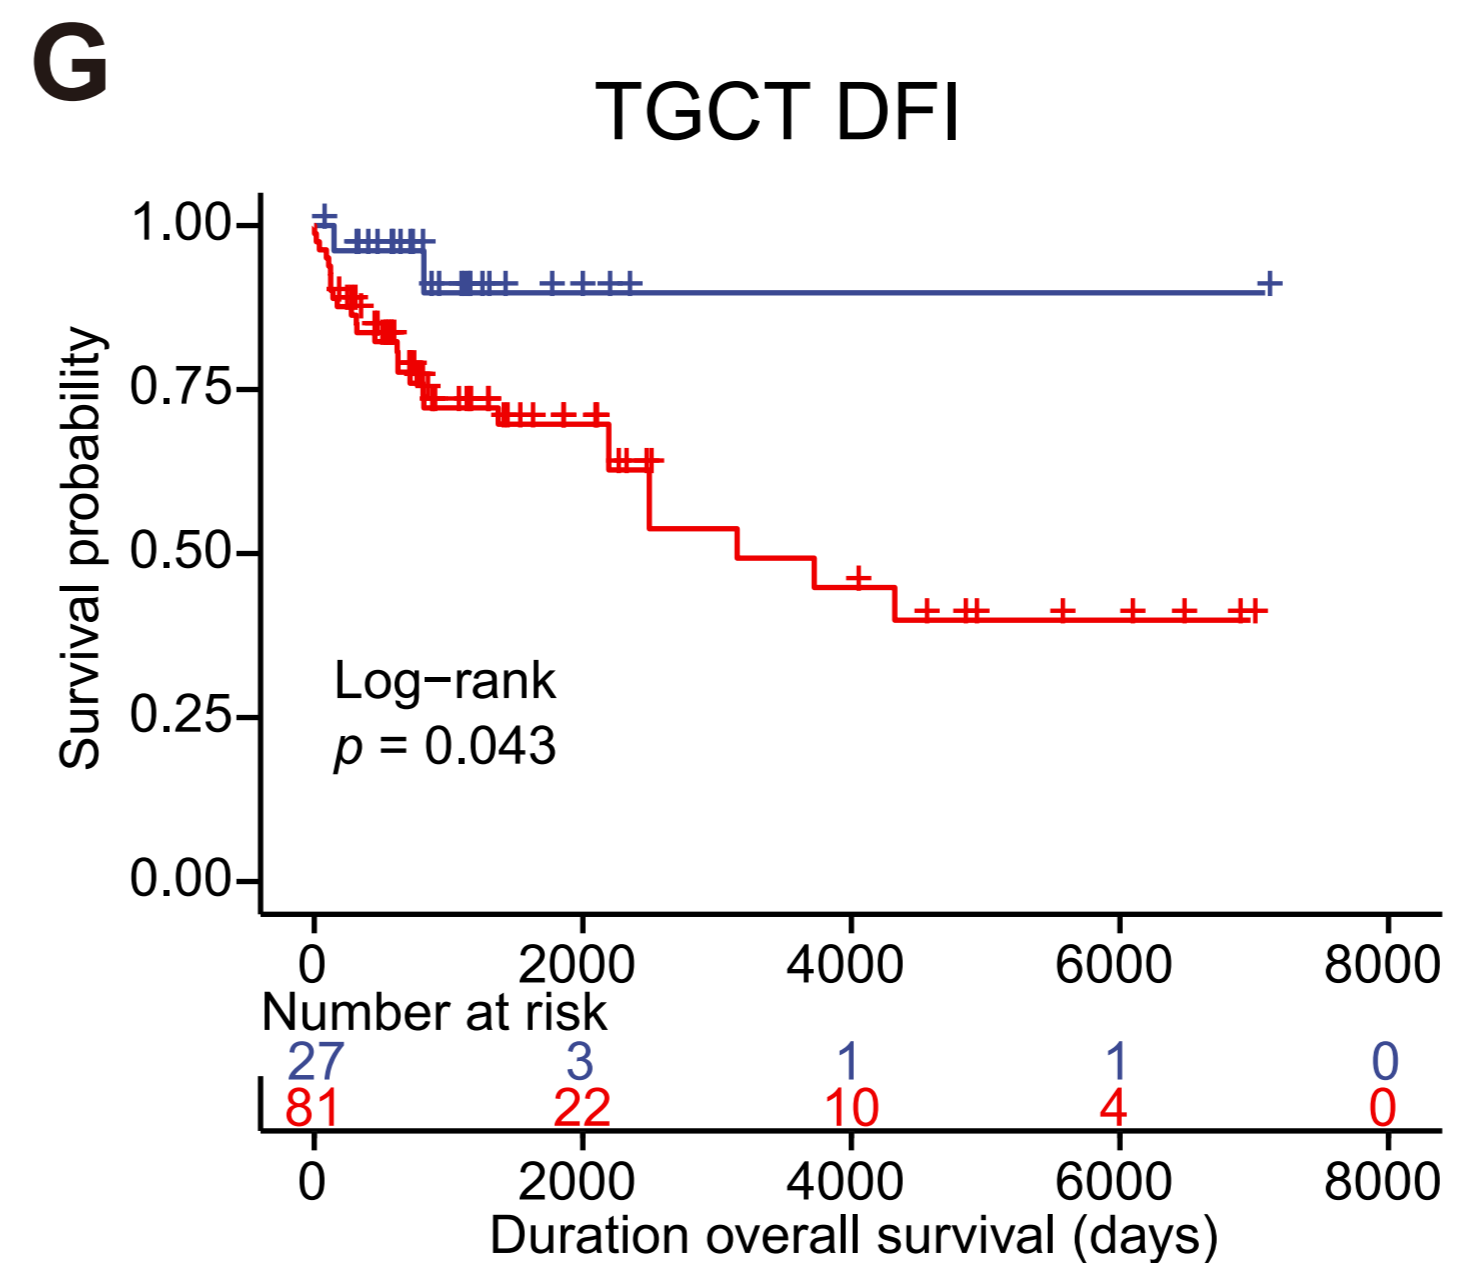

 High expression of OGN  
 Low expression of OGN
