# Supplementary material for: PFKP is a prospective prognostic, diagnostic, immunological and drug sensitivity predictor across pan-cancer
Source: Springer Nature journal article supplement (doi:10.1038/s41598-023-43982-2), 2023-10-13

**A****Correlation between PFKP and Chemokines related genes**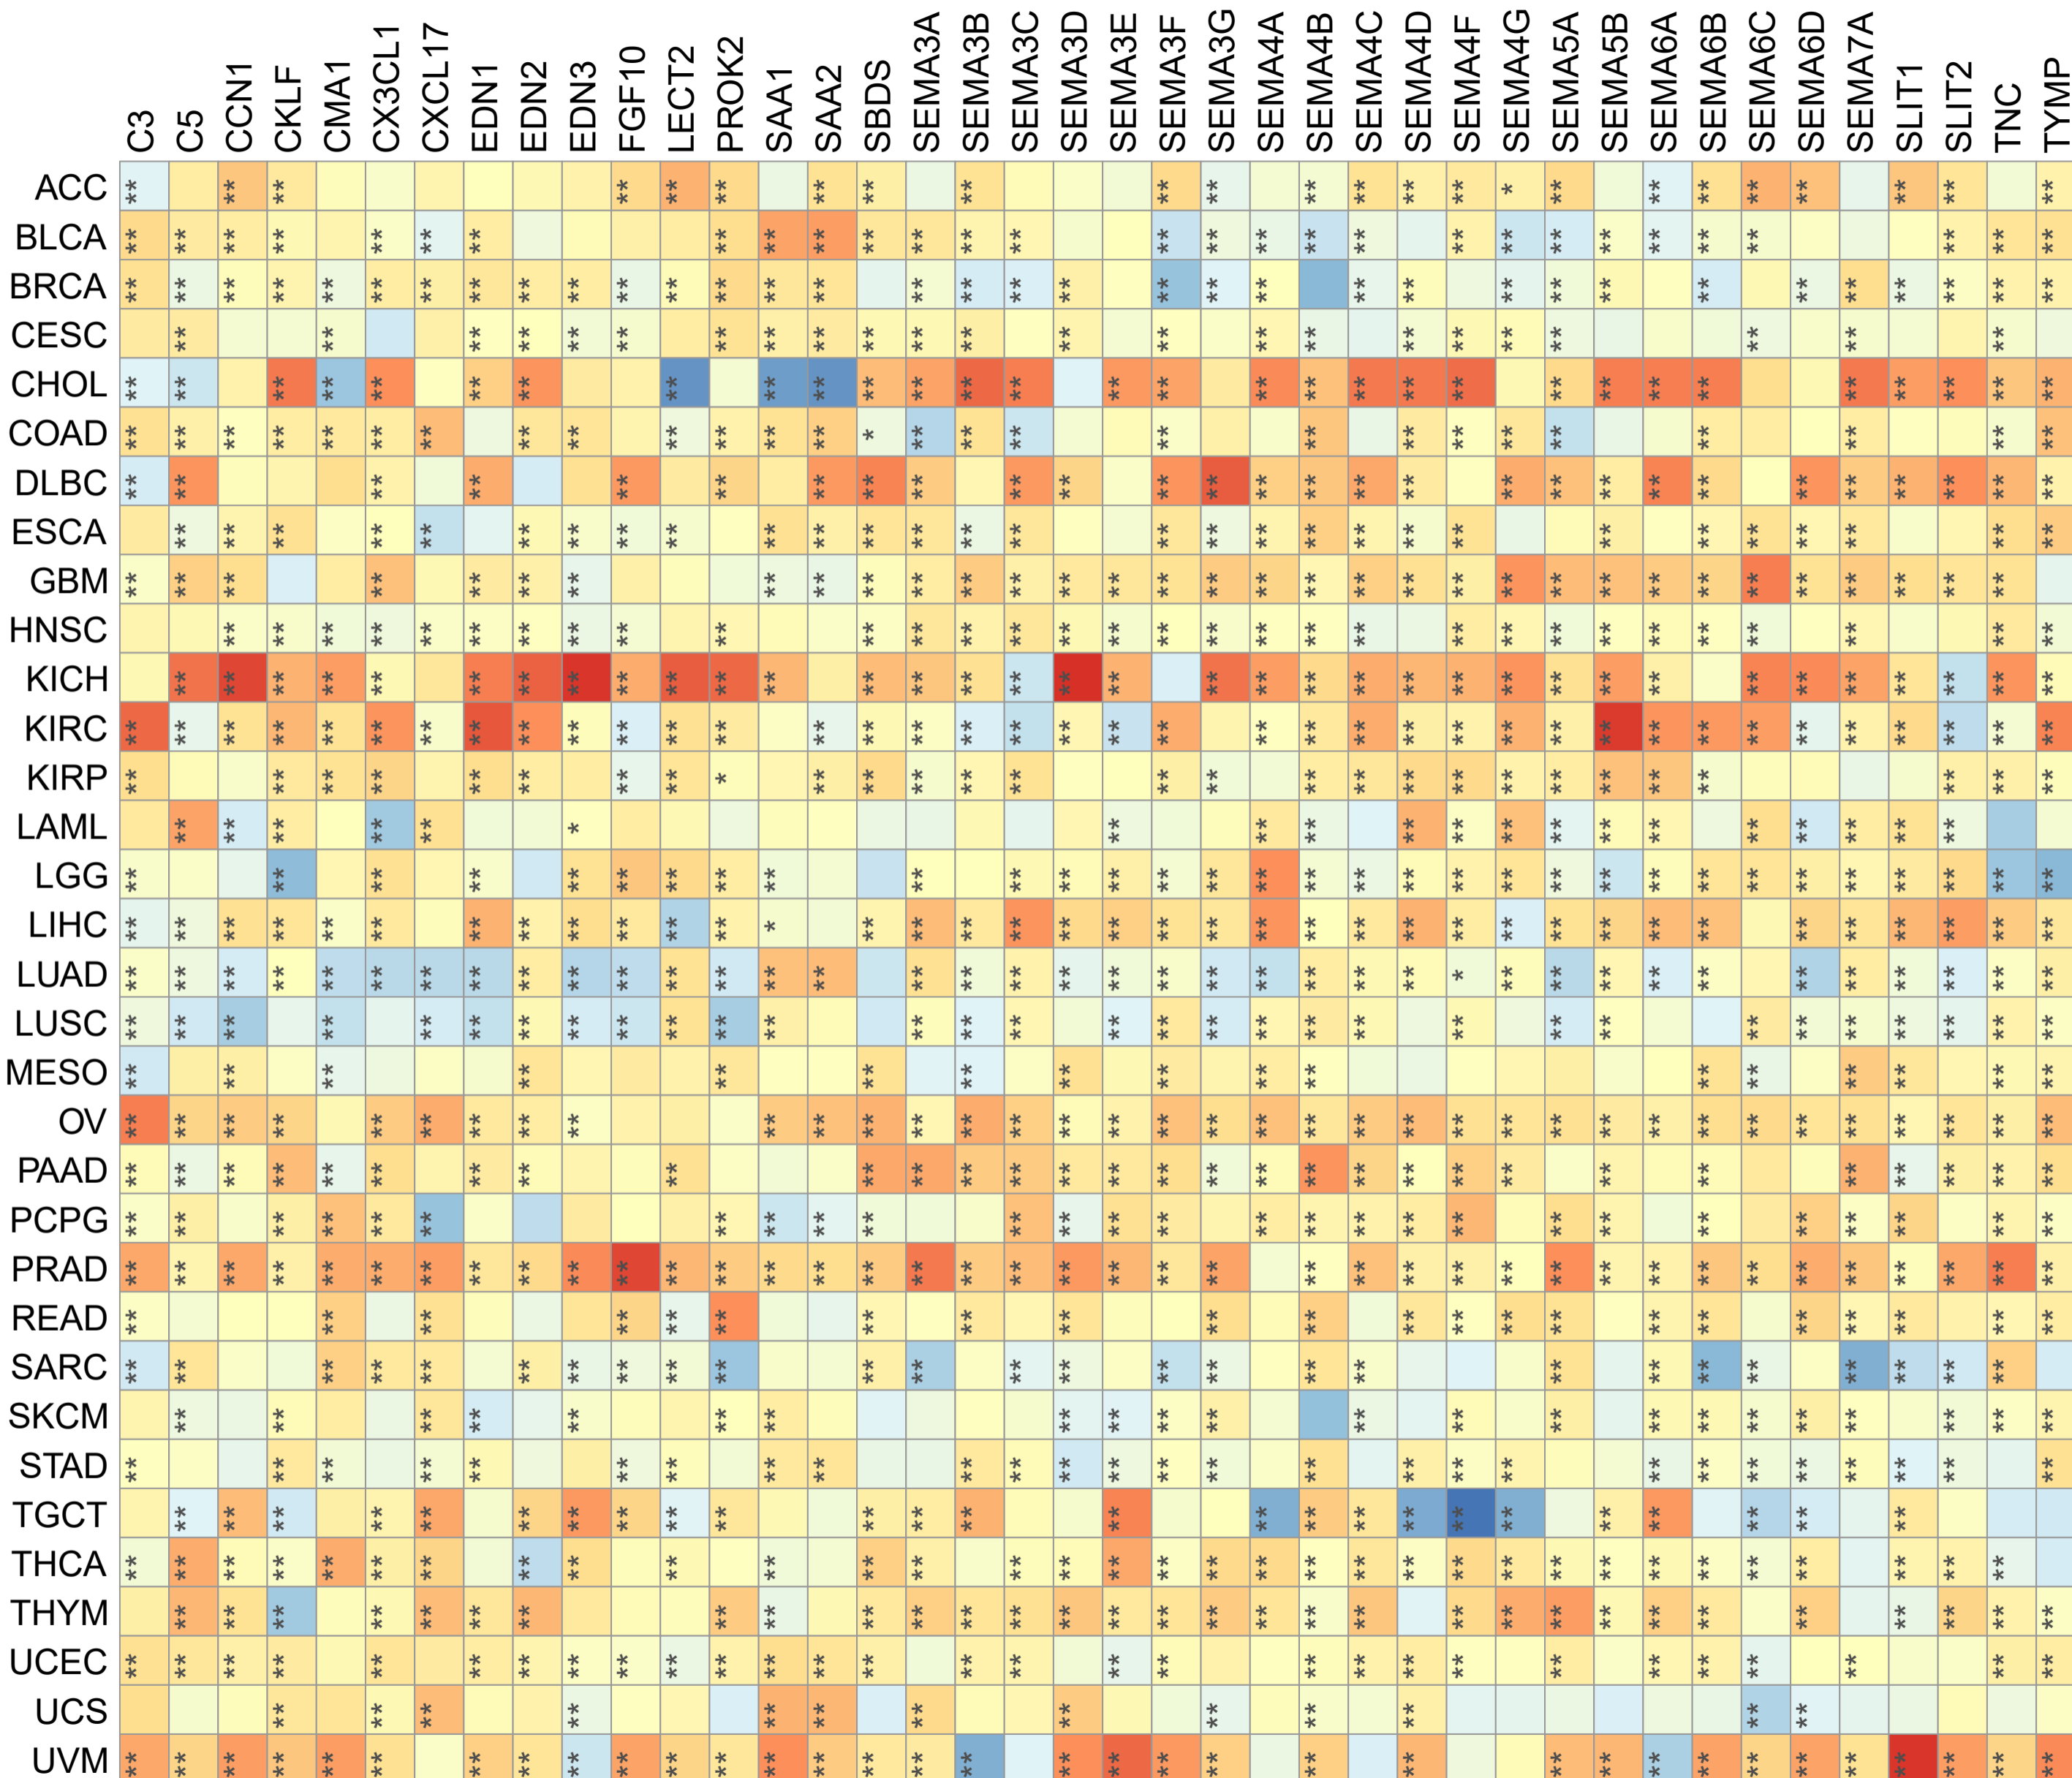**B****Correlation between PFKP and Chemokine Receptors related genes**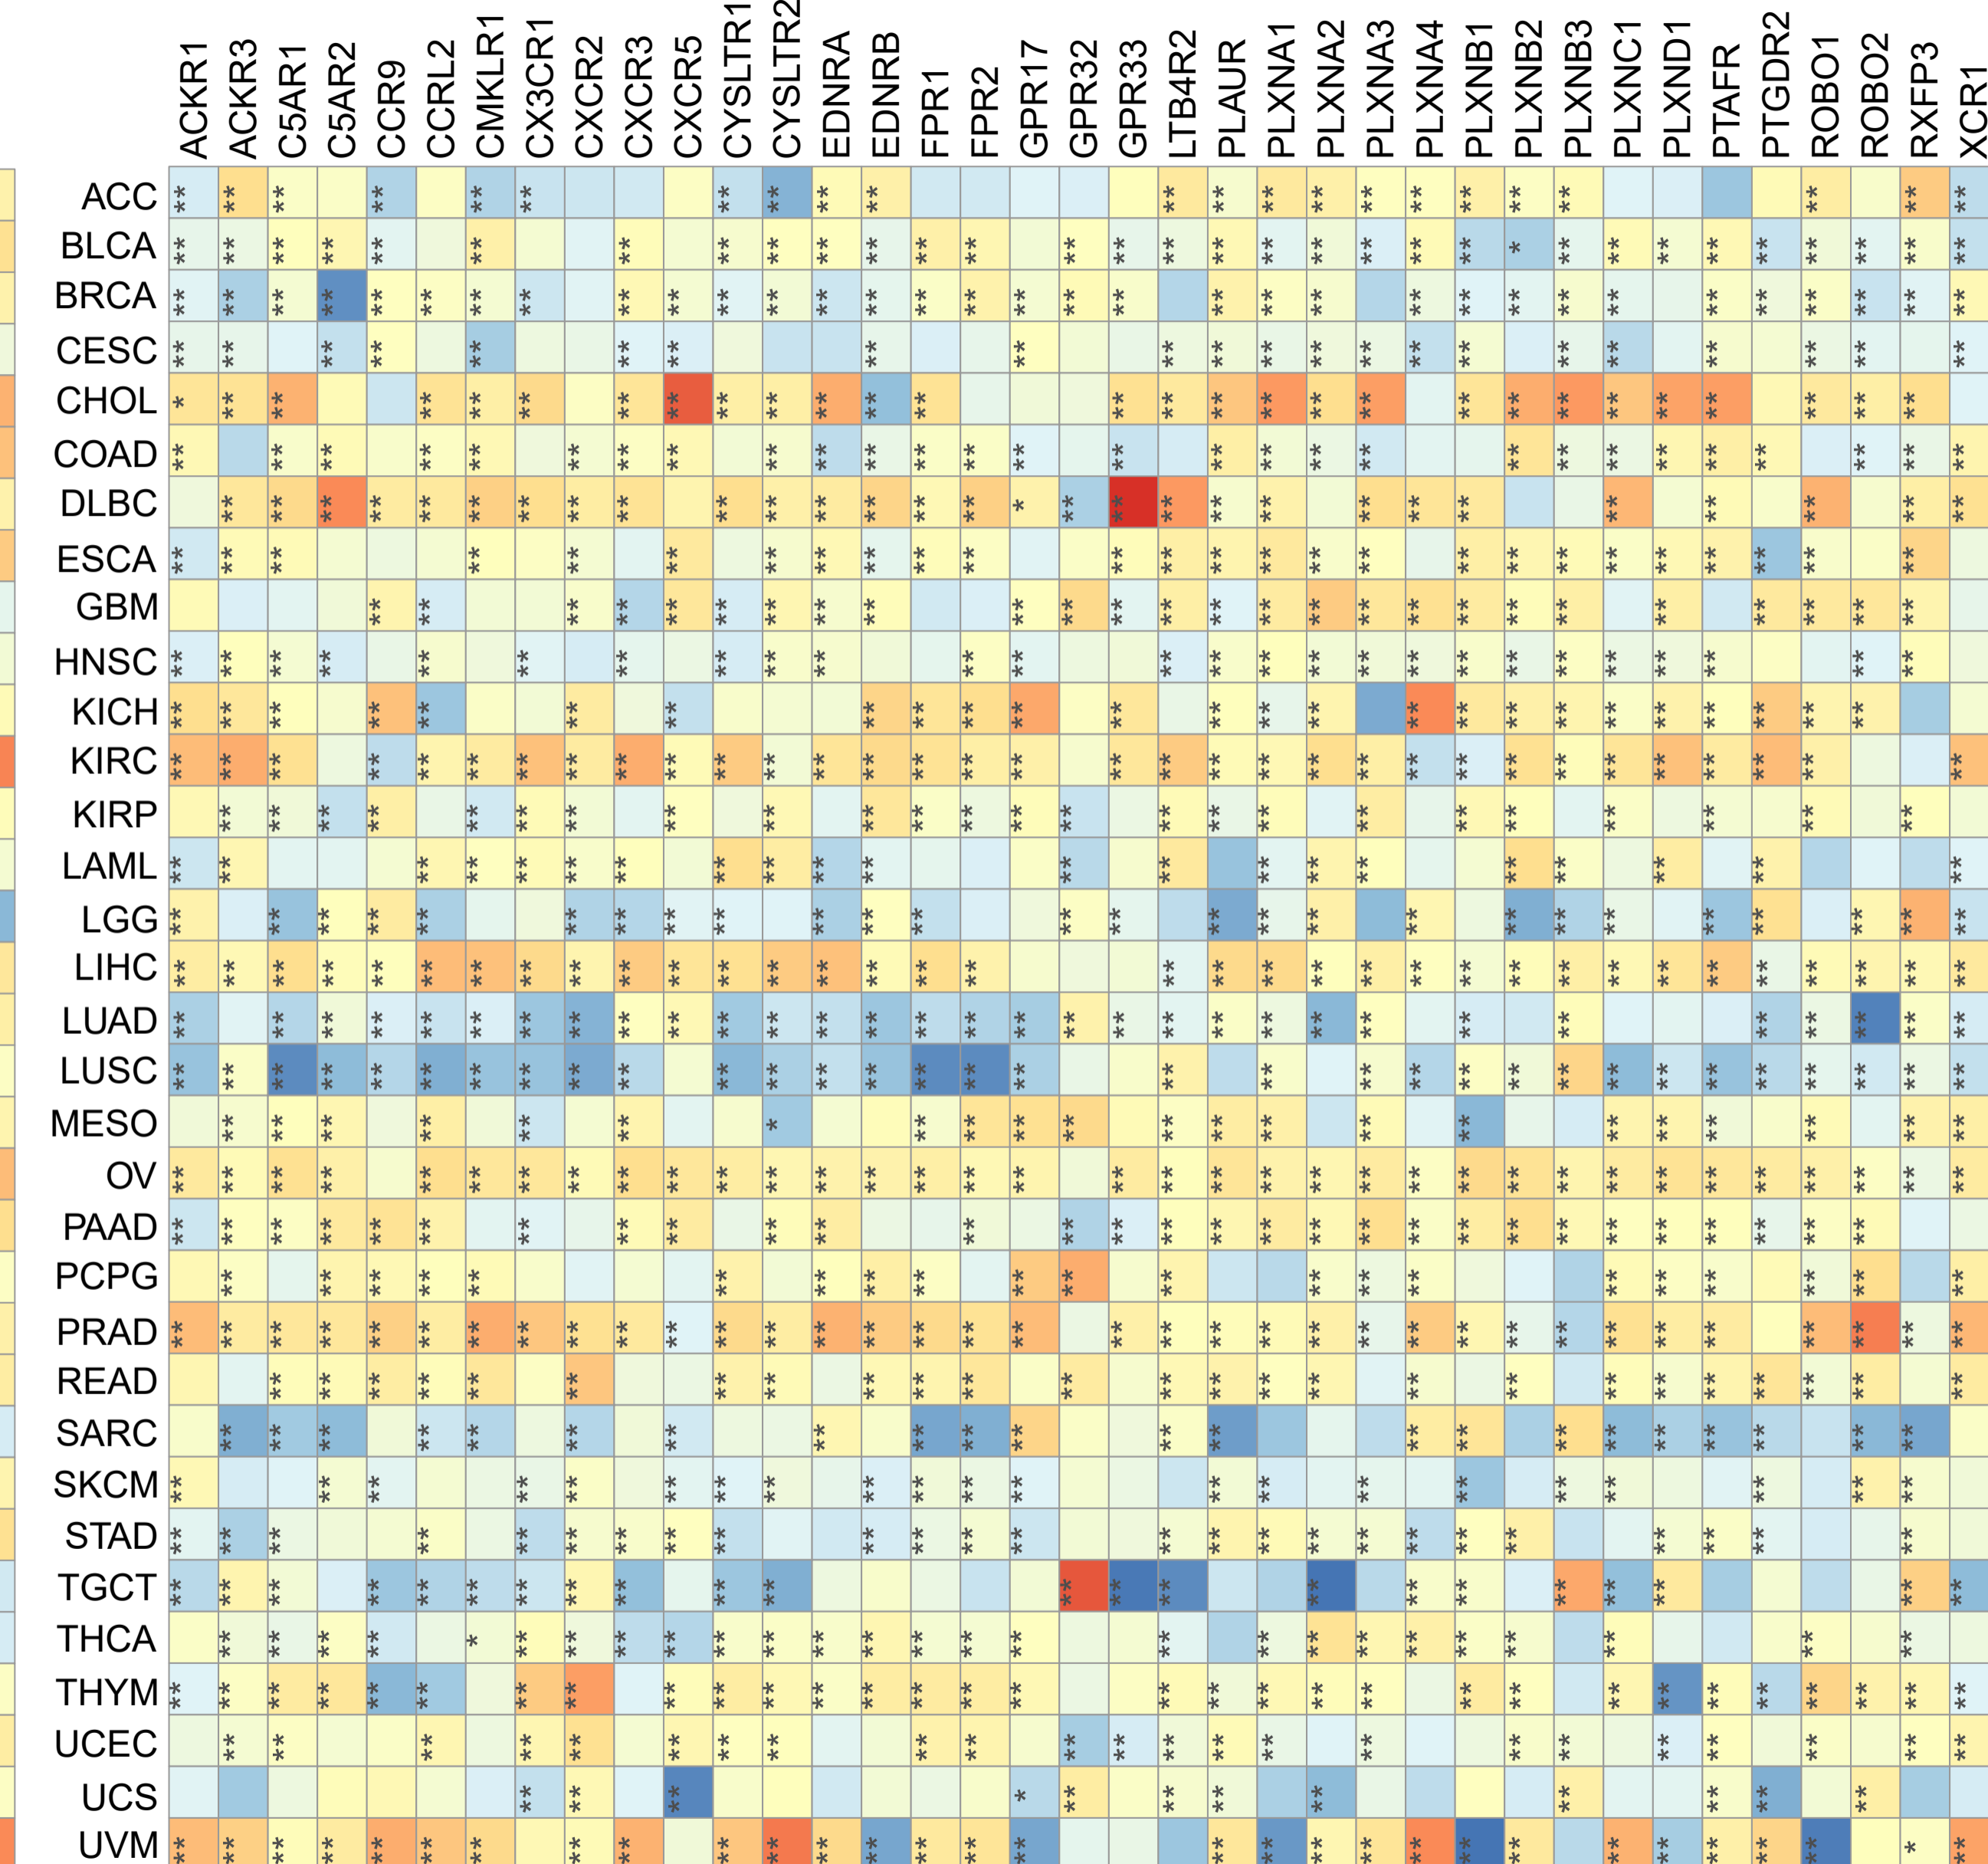

2 1 0 -1 -2 -3

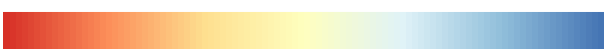

Supplement: MOESM5 [file 41598_2023_43982_MOESM5_ESM.pdf]
