# Supplementary material for: PFKP is a prospective prognostic, diagnostic, immunological and drug sensitivity predictor across pan-cancer
Source: Springer Nature journal article supplement (doi:10.1038/s41598-023-43982-2), 2023-10-13

Correlation between PFKP and Microsatellite instability(MSI)

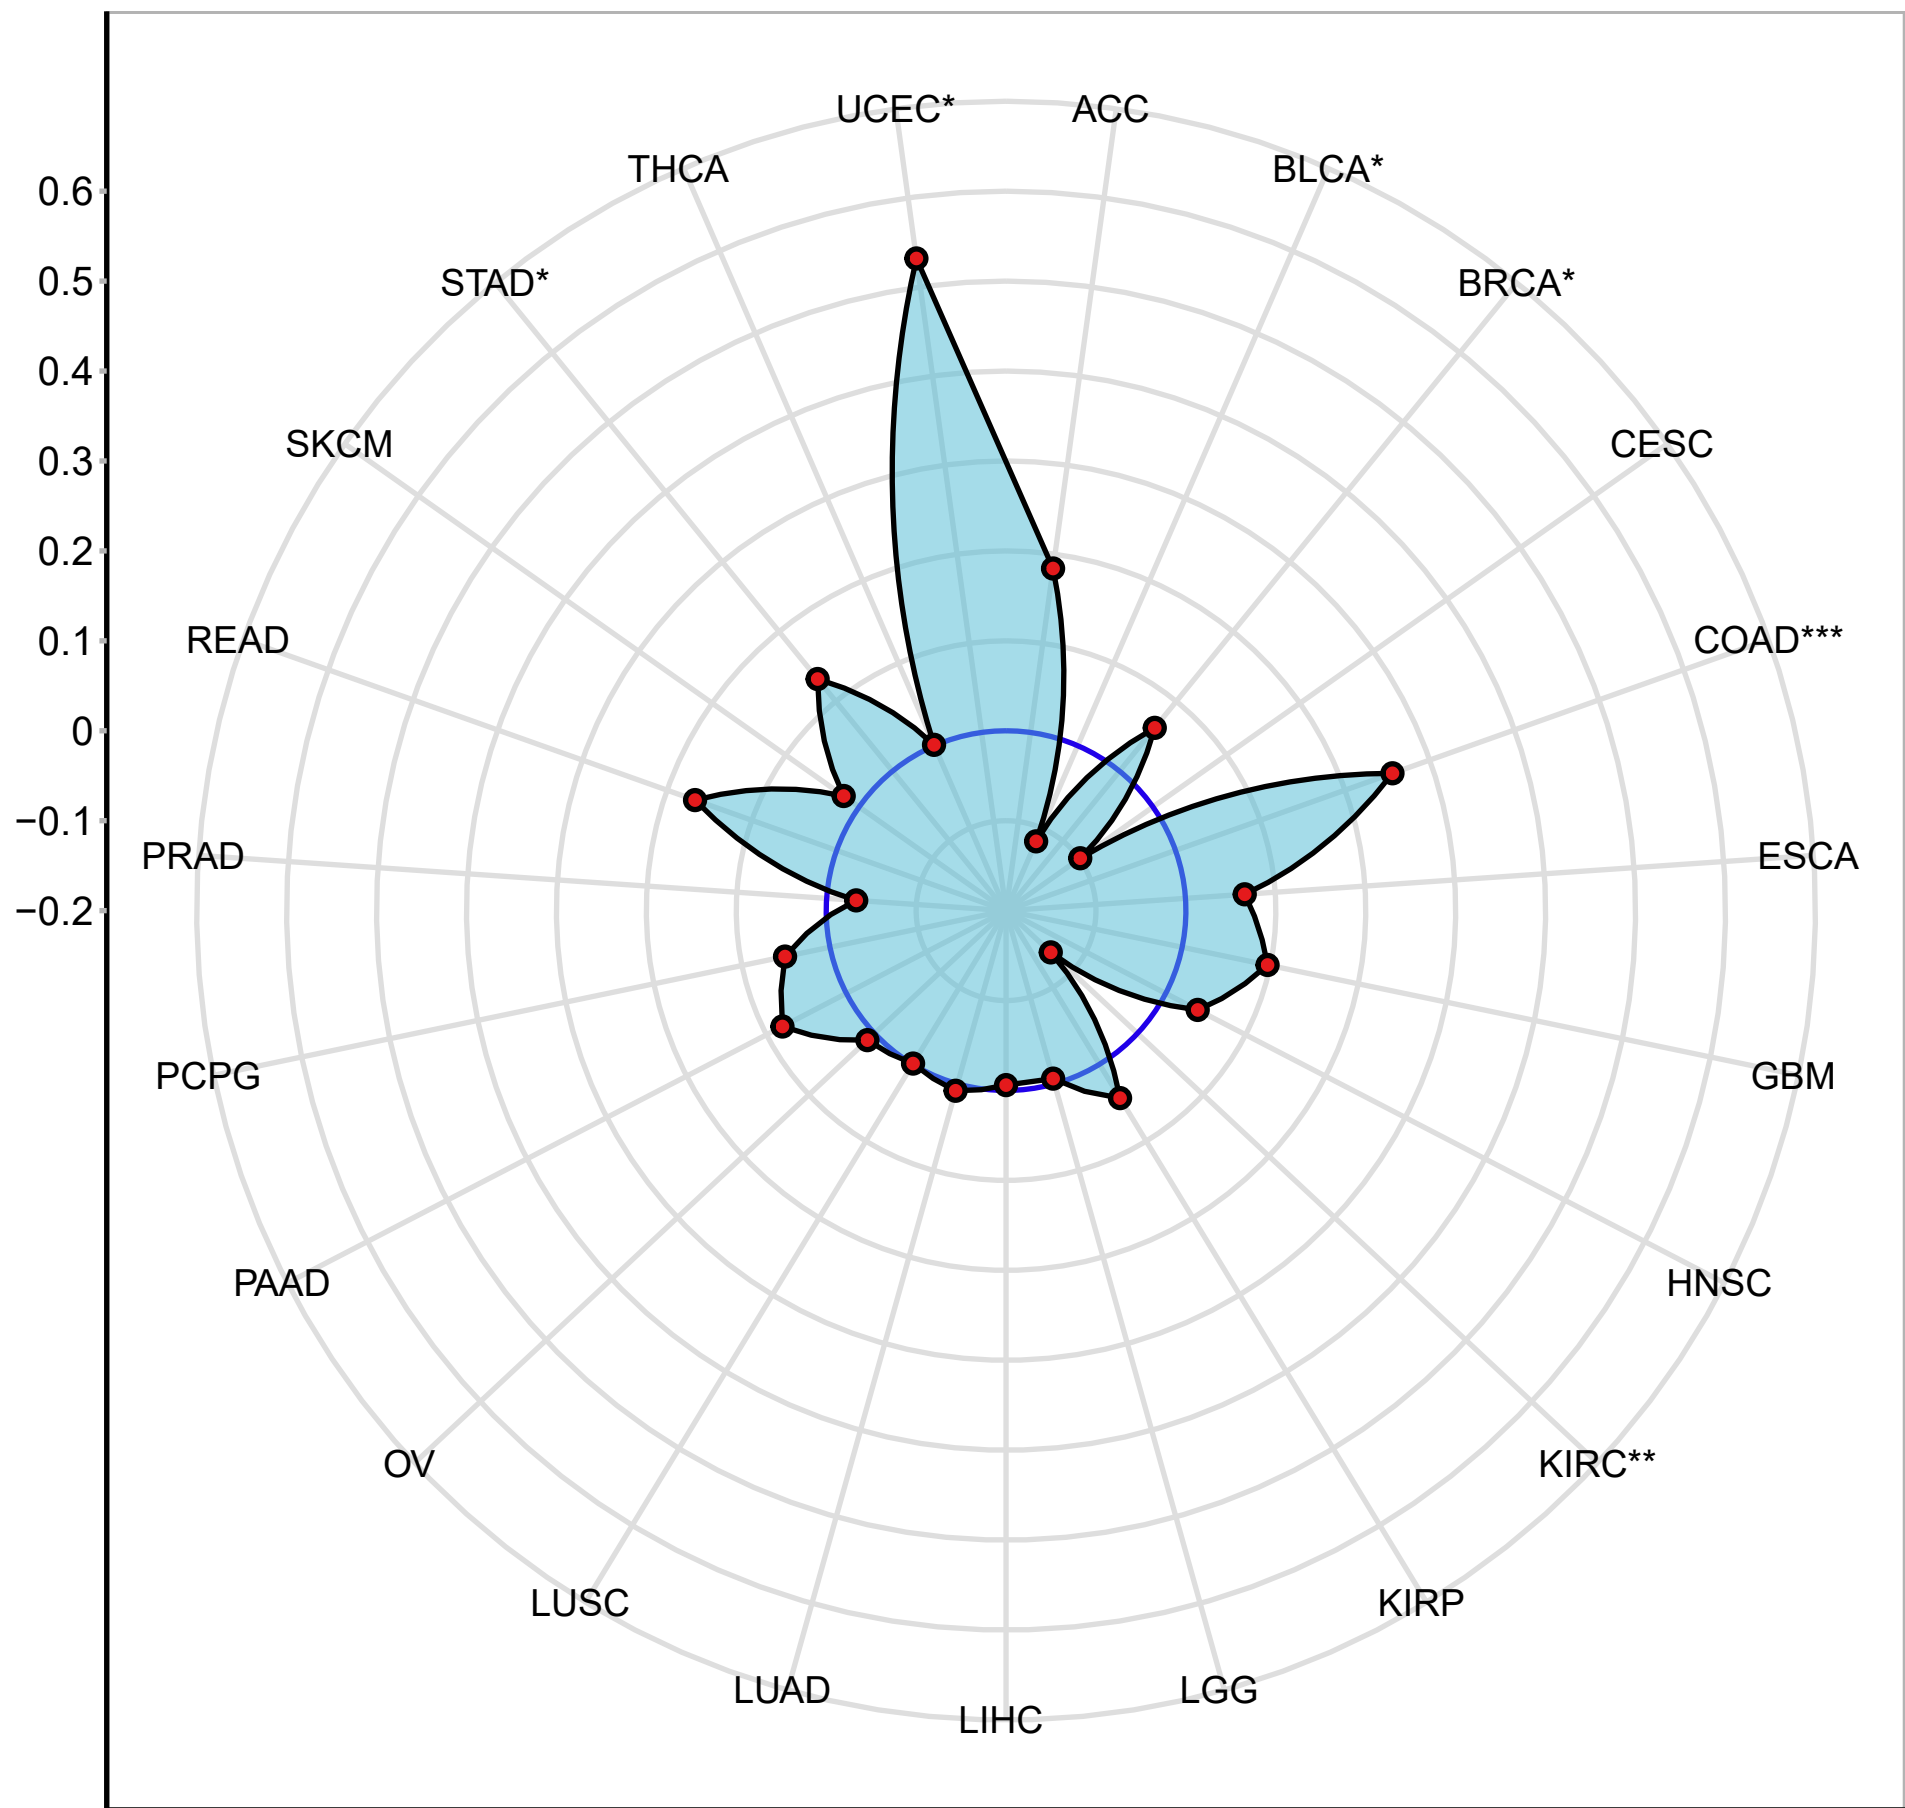

Supplement: MOESM8 [file 41598_2023_43982_MOESM8_ESM.pdf]
